# Supplementary material
Source: PubMed Central journal article supplement (PMC6453817)

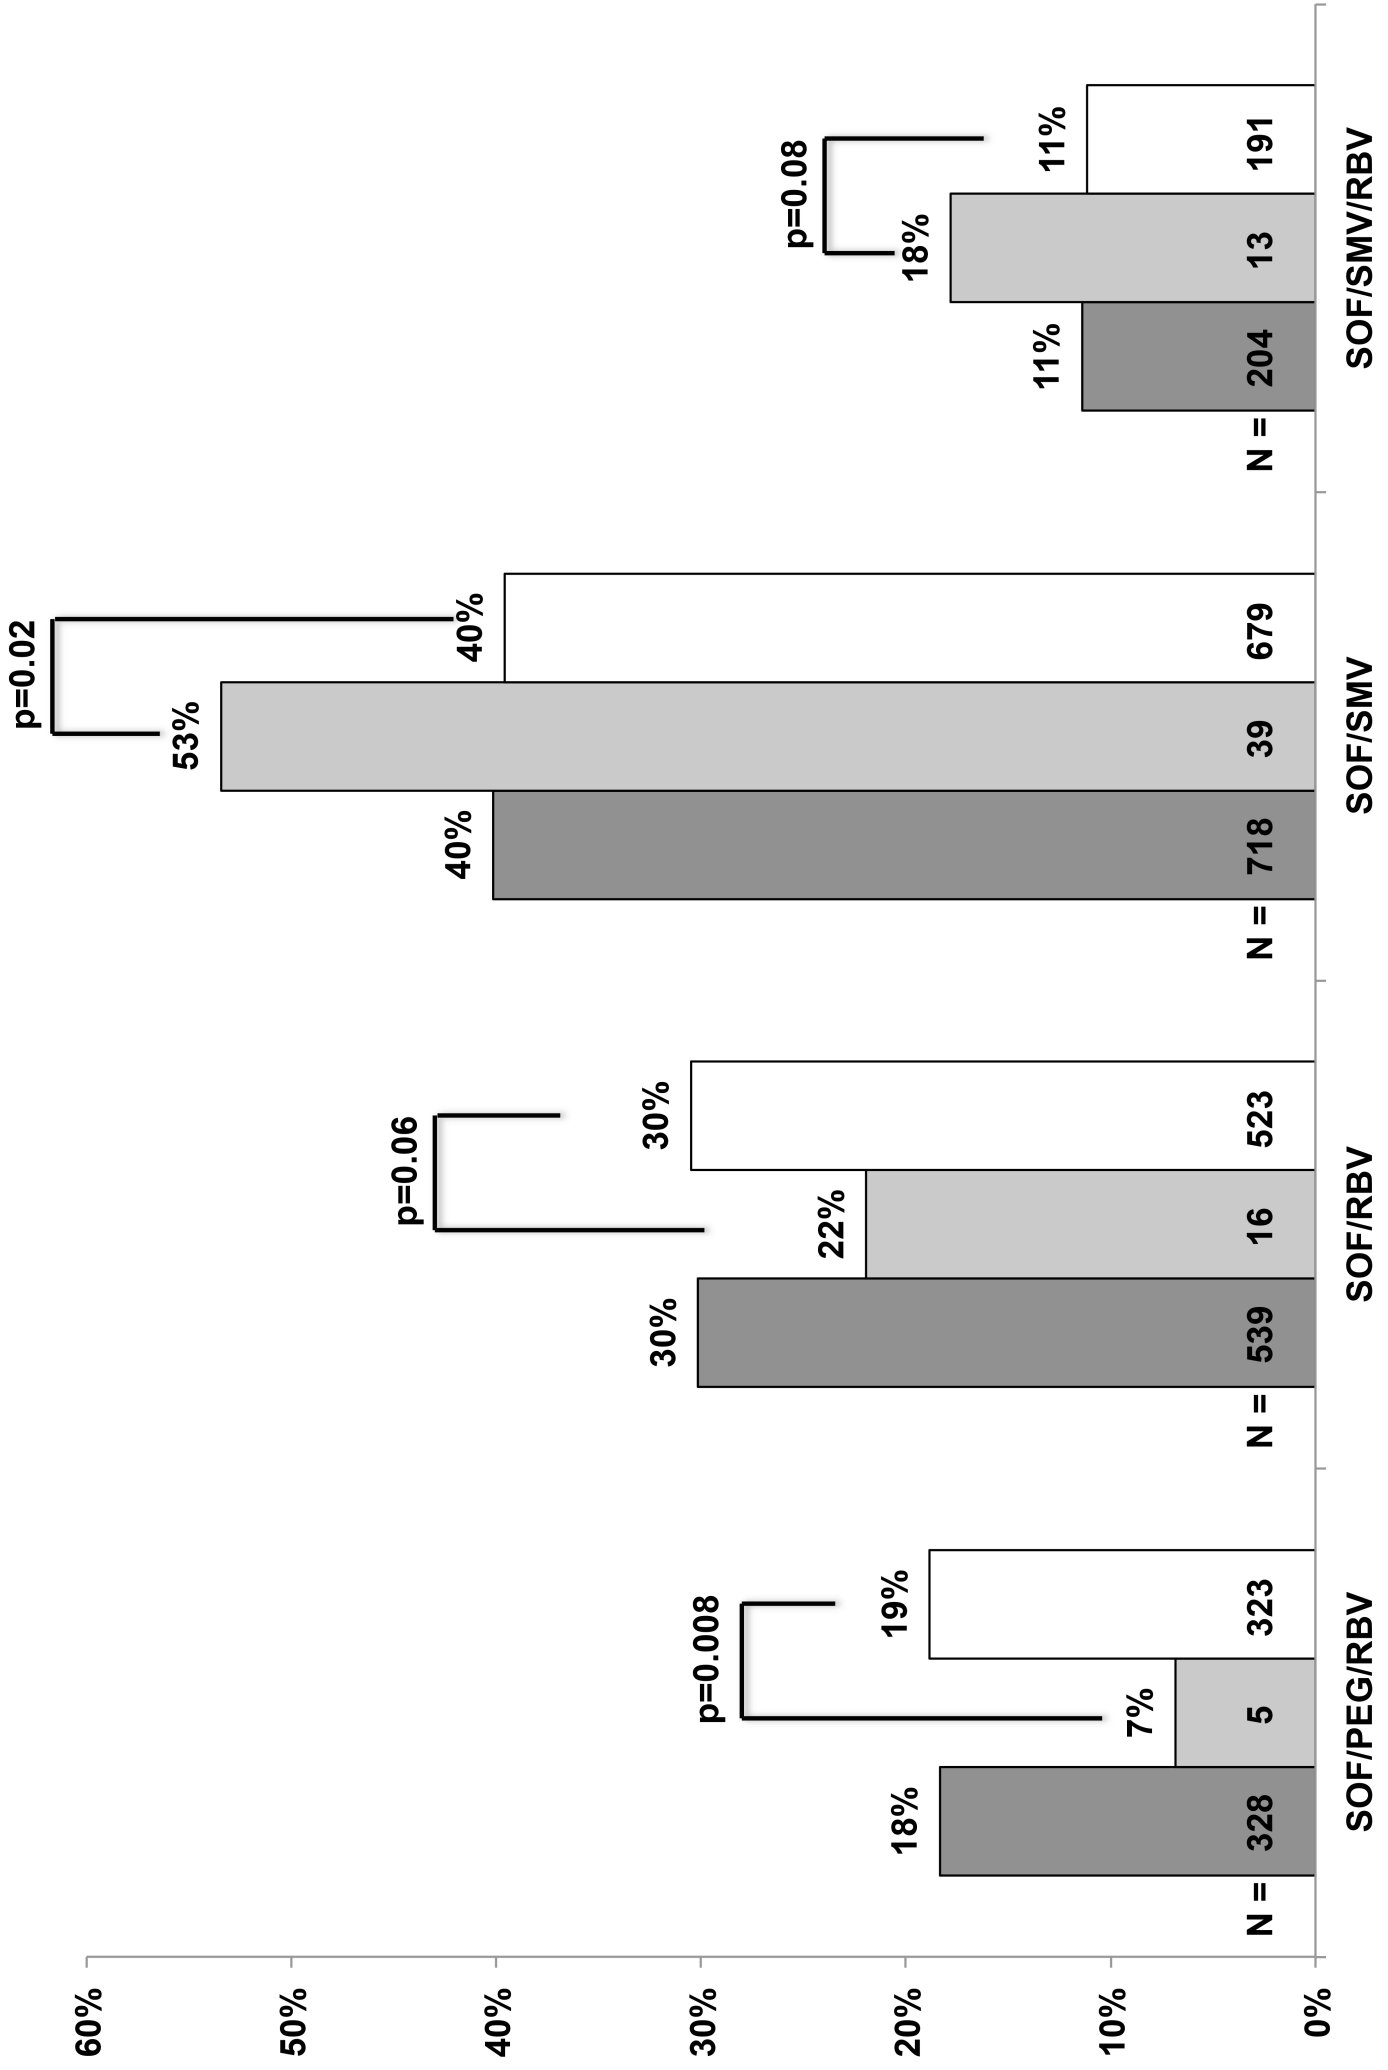

■ All Patients (N=1,789)    □ eGFR ≤45 ml/min/1.73m2 (N=73)    □ eGFR >45 ml/min/1.73m2 (N=1,716)

Supplement: NIHMS1019881-supplement-Fig_1.pdf [file NIHMS1019881-supplement-Fig_1.pdf]

$p < 0.001$

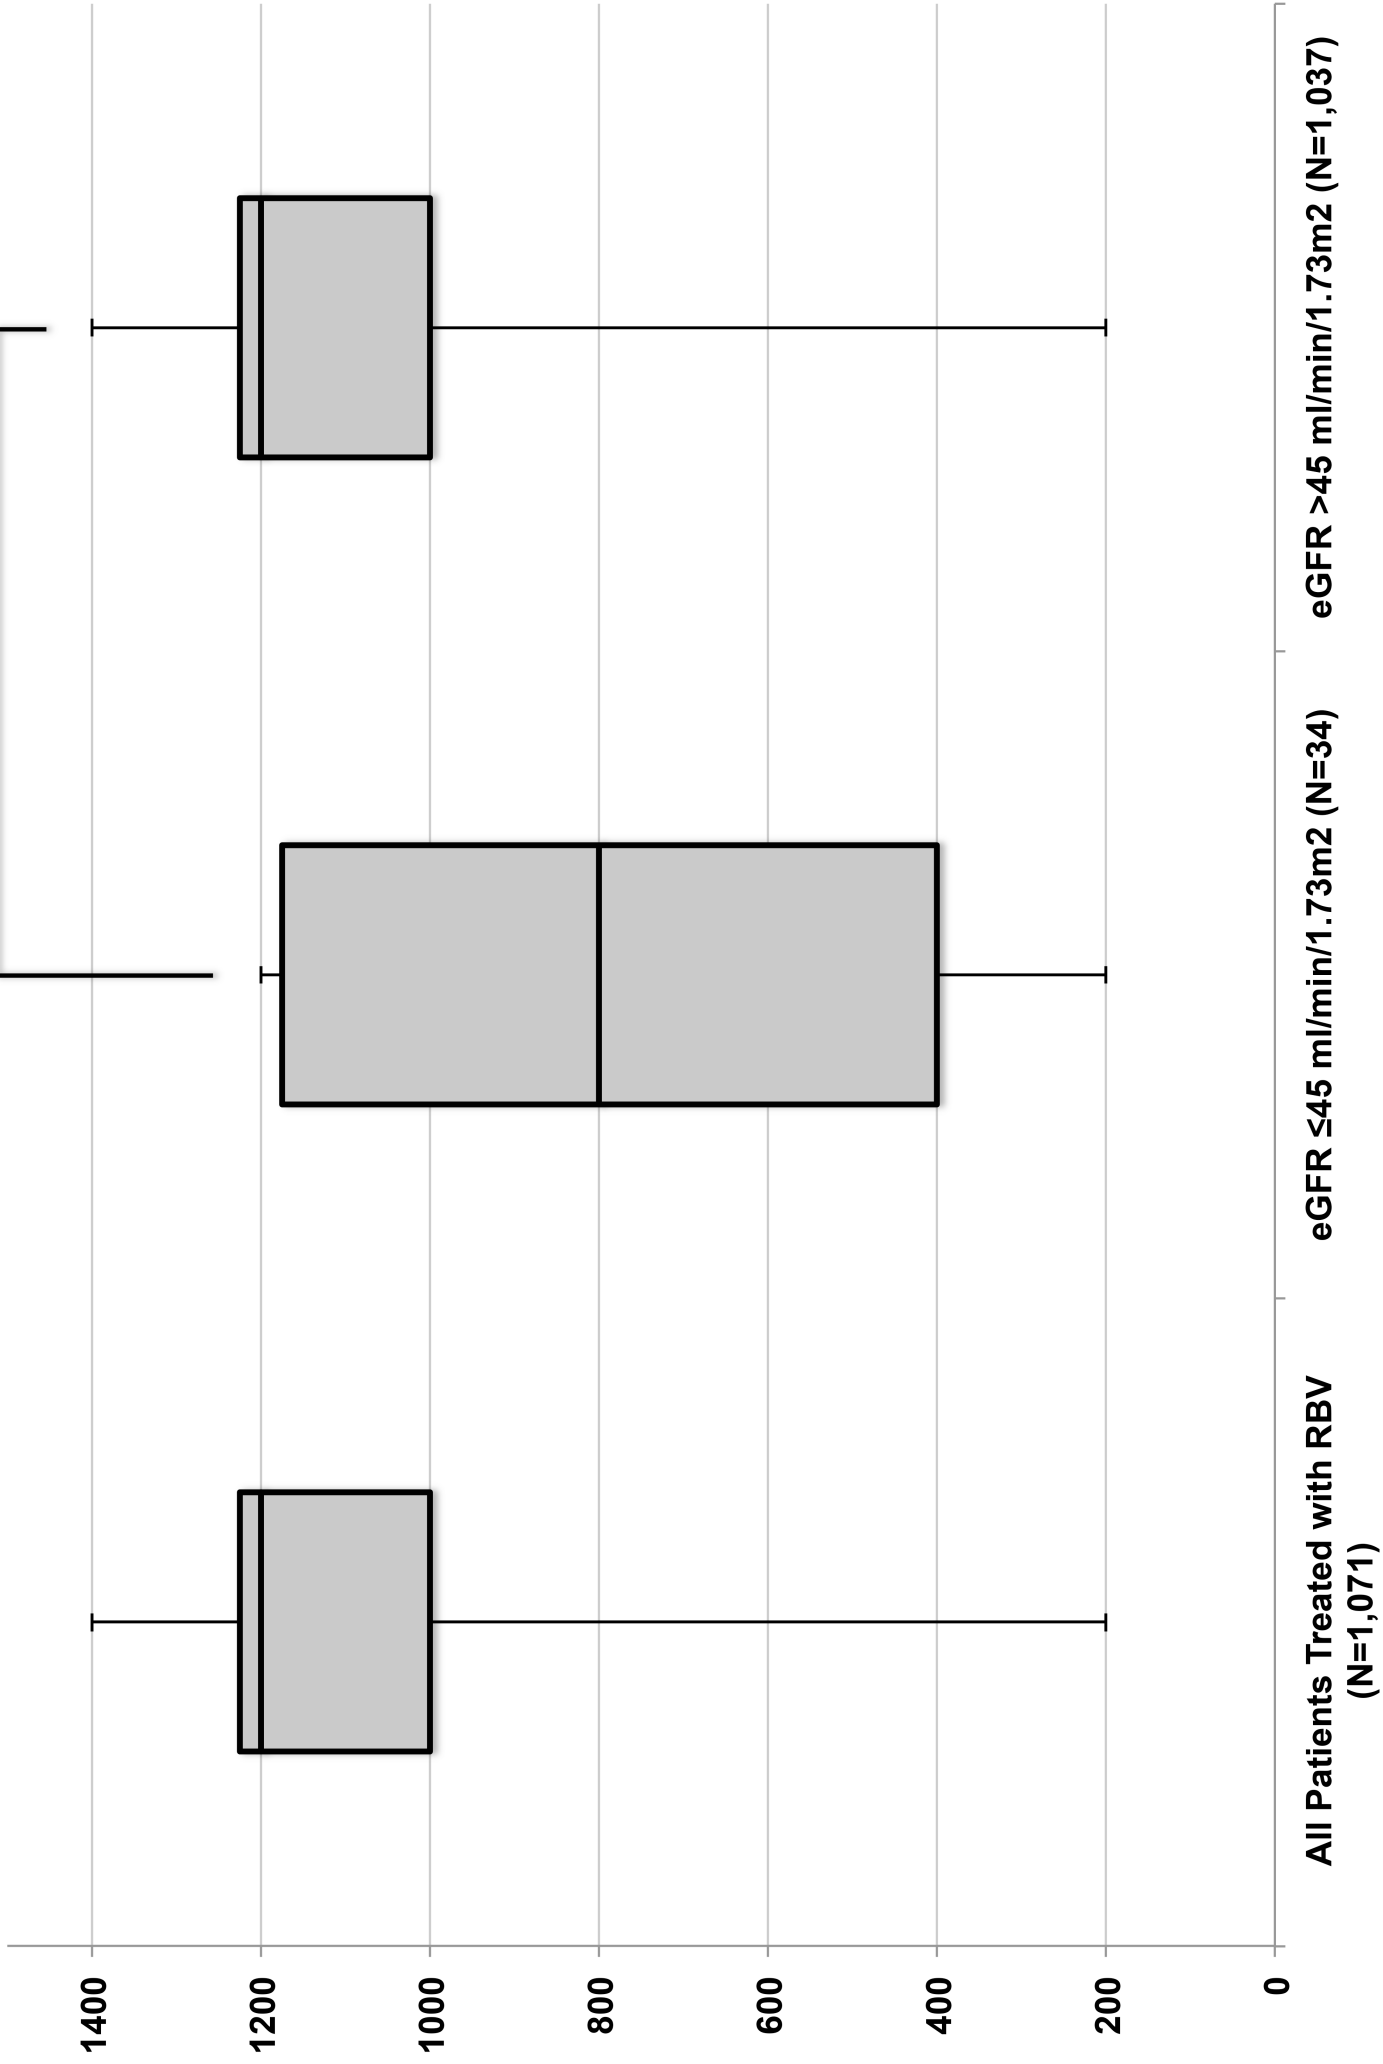

Supplement: NIHMS1019881-supplement-Fig_2.pdf [file NIHMS1019881-supplement-Fig_2.pdf]

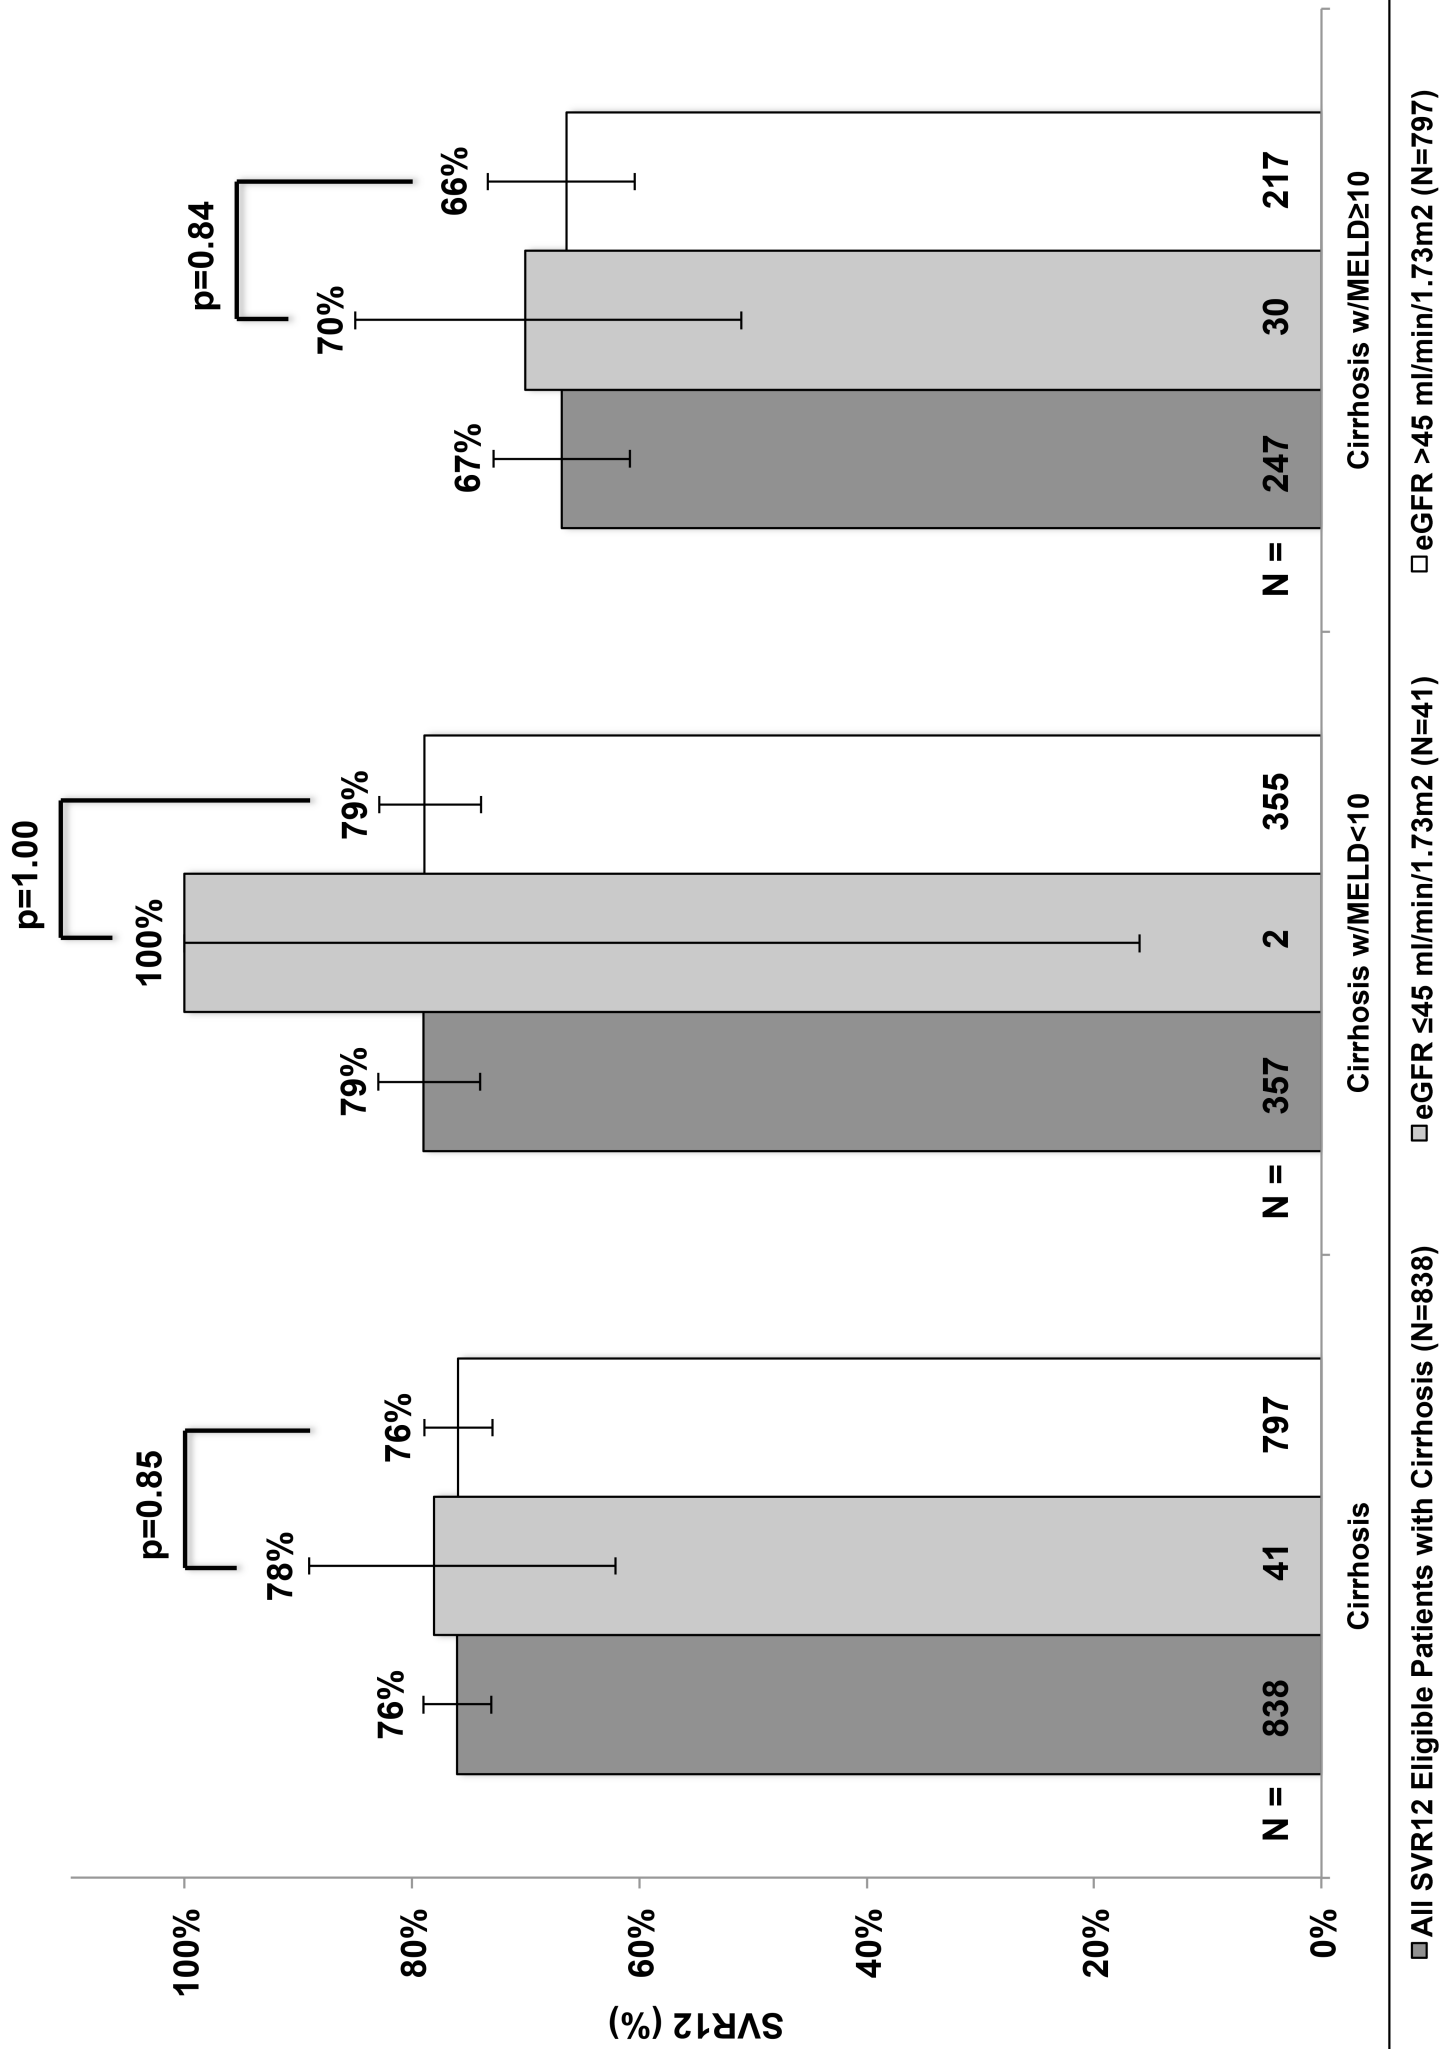

Supplement: NIHMS1019881-supplement-Fig_3.pdf [file NIHMS1019881-supplement-Fig_3.pdf]
